# Supplementary material for: Legalisation of euthanasia and assisted suicide: advanced cancer patient opinions – cross-sectional multicentre study
Source: PubMed Central journal article supplement — BMJ Support Palliat Care. 2023 Aug 3;13(e3):e1335–41. doi: 10.1136/spcare-2022-004134 (PMC10850827; doi:10.1136/spcare-2022-004134), 2023-08-03
Supplement: spcare-2022-004134supp001.pdf [file spcare-2022-004134supp001.pdf]

|                                                                                                                                            |                                                                                       |                                                                                                                               |
|--------------------------------------------------------------------------------------------------------------------------------------------|---------------------------------------------------------------------------------------|-------------------------------------------------------------------------------------------------------------------------------|
| <b>AP-HM 2017-35 EPAL</b>                                                                                                                  | <b>Patient number:</b> <input type="text"/> <input type="text"/> <input type="text"/> | <input type="text"/> <input type="text"/> <input type="text"/> <input type="text"/> <input type="text"/> <input type="text"/> |
| <b>N°2017-A01846-47</b>                                                                                                                    | Centre N°.                                                                            | Inclusion N°.                                                                                                                 |
| <b>Patient's initials (First name /family name):</b> <input type="text"/> <input type="text"/> - <input type="text"/> <input type="text"/> |                                                                                       |                                                                                                                               |
|                                                                                                                                            |                                                                                       |                                                                                                                               |

**Cancer patients' opinion on the Claeys-Leonetti law: EPAL study**

|                                                                                                              |                        |                                              |                                                                    |
|--------------------------------------------------------------------------------------------------------------|------------------------|----------------------------------------------|--------------------------------------------------------------------|
| <b>AP-HM 2017-35 EPAL</b>                                                                                    | <b>Patient number:</b> | <div><div></div><div></div><div></div></div> | <div><div></div><div></div><div></div><div></div><div></div></div> |
| <b>N°2017-A01846-47</b>                                                                                      |                        | Centre N°.                                   | Inclusion N°.                                                      |
| <b>Patient's initials (First name /family name):</b> <div><div></div><div></div><div></div><div></div></div> |                        |                                              |                                                                    |

Medical form

PERSONAL DATA:

Gender: ☐ Male ☐ Female

Date of birth:  /  /

Date of interview:  /  /

Hospitalized patient: ☐ Yes ☐ No

If Yes, date of hospitalization:  /  /

Date of death:  /  /

INCLUSION CRITERIA

Male or female, of legal age ☐ Yes ☐ No

A person with locally advanced or metastatic cancer who is therefore eligible for palliative care according to the definition set out by the French Society for Accompaniment and Palliative Care (active multidisciplinary care in a global approach to the person suffering from a serious progressive illness or at the end of life) [Palliative Care Charter, 1996; Law n°99-477 of June 9, 1999 aimed at guaranteeing the right to access palliative care]. This definition is directly derived from that of the World Health Organization [World Health Organization. WHO pain ladder. Available from: <http://www.who.int/cancer/palliative/painladder/en/>. Accessed December 9, 2011]. ☐ Yes ☐ No

|                           |                                                                                                                                          |                                                                                                      |
|---------------------------|------------------------------------------------------------------------------------------------------------------------------------------|------------------------------------------------------------------------------------------------------|
| <b>AP-HM 2017-35 EPAL</b> | <b>Patient number:</b> <input type="text"/> <input type="text"/> <input type="text"/><br>Centre N°.                                      | <input type="text"/> <input type="text"/> <input type="text"/> <input type="text"/><br>Inclusion N°. |
| N°2017-A01846-47          | <b>Patient's initials (First name /family name):</b> <input type="text"/> <input type="text"/> <input type="text"/> <input type="text"/> |                                                                                                      |
| <br><br><br><br><br>      |                                                                                                                                          |                                                                                                      |

Subject hospitalized in a palliative care unit (USP) or identified palliative care beds (LISP) or followed by an EMSP (mobile palliative care team) or subjects at home followed by a palliative care network or a mobile palliative care team outside the hospital.

☐ Yes ☐ No

Patient accepts to participate in study

☐ Yes ☐ No

CRITERIA FOR NON-INCLUSION

Subject understands purpose and conditions of study.

☐ Yes ☐ No

MEDICAL DATA:

Date of diagnosis:  /  /

Which type of cancer does the patient have?

- ☐ ENT
- ☐ Digestive
- ☐ Gynaecological
- ☐ Pulmonary
- ☐ Cerebral primitive
- ☐ Dermatological
- ☐ Urological
- ☐ Haematological
- ☐ Sarcoma
- ☐ Other, specify: .....

Number of metastatic sites:

WHO Index:

Is the patient receiving any tier III pain medication?

|                                                                                                                                                                                                                                                        |                                                                                                                                                                                                                                                       |                                                                                                                                                                                                                                                                                                                                                                                                                                     |
|--------------------------------------------------------------------------------------------------------------------------------------------------------------------------------------------------------------------------------------------------------|-------------------------------------------------------------------------------------------------------------------------------------------------------------------------------------------------------------------------------------------------------|-------------------------------------------------------------------------------------------------------------------------------------------------------------------------------------------------------------------------------------------------------------------------------------------------------------------------------------------------------------------------------------------------------------------------------------|
| <b>AP-HM 2017-35 EPAL</b><br><br>N°2017-A01846-47                                                                                                                                                                                                      | Patient <b>number:</b> <span style="border: 1px solid black; display: inline-block; width: 20px; height: 15px;"></span> <span style="border: 1px solid black; display: inline-block; width: 20px; height: 15px;"></span><br><small>Centre N°.</small> | <span style="border: 1px solid black; display: inline-block; width: 20px; height: 15px;"></span> <span style="border: 1px solid black; display: inline-block; width: 20px; height: 15px;"></span> <span style="border: 1px solid black; display: inline-block; width: 20px; height: 15px;"></span> <span style="border: 1px solid black; display: inline-block; width: 20px; height: 15px;"></span><br><small>Inclusion N°.</small> |
| <b>Patient's initials (First name /family name):</b> <span style="border: 1px solid black; display: inline-block; width: 20px; height: 15px;"></span> <span style="border: 1px solid black; display: inline-block; width: 20px; height: 15px;"></span> |                                                                                                                                                                                                                                                       |                                                                                                                                                                                                                                                                                                                                                                                                                                     |

☐ Yes☐ No**MEDICAL DATA:**

In the curability phase, the patient received:

***(Check more than one box, if appropriate)***

- ☐ Adjuvant chemotherapy
- ☐ Neo-adjuvant chemotherapy
- ☐ Radiotherapy
- ☐ Surgery
- ☐ Immunotherapy
- ☐ Targeted therapy
- ☐ No treatment

Is the date of diagnosis of incurability different from the date of diagnosis of the disease?

☐ Yes☐ NoIf yes, date of diagnosis of incurability:  /  / 

Since the diagnosis of incurability, has the patient received:

***(Check more than one box, if appropriate)***

- ☐ Chemotherapy
- ☐ Radiotherapy
- ☐ Surgery
- ☐ Immunotherapy
- ☐ Targeted therapy
- ☐ No treatment

How many lines of systemic treatment were administered (total including curable and incurable phase)? Cancer treatment still in progress: ☐ Yes☐ No

|                           |                                                                                                                                          |                                                                                                      |
|---------------------------|------------------------------------------------------------------------------------------------------------------------------------------|------------------------------------------------------------------------------------------------------|
| <b>AP-HM 2017-35 EPAL</b> | <b>Patient number:</b> <input type="text"/> <input type="text"/> <input type="text"/><br>Centre N°.                                      | <input type="text"/> <input type="text"/> <input type="text"/> <input type="text"/><br>Inclusion N°. |
| <b>N°2017-A01846-47</b>   | <b>Patient's initials (First name /family name):</b> <input type="text"/> <input type="text"/> <input type="text"/> <input type="text"/> |                                                                                                      |
|                           |                                                                                                                                          |                                                                                                      |

**MEDICAL DATA:**

To date, does the patient have any symptoms (*grade according to the CTCAE*)

| Symptoms | NCI Grade                                 |
|----------|-------------------------------------------|
| .....    | <input type="text"/> <input type="text"/> |

**Cancer patients' opinion on the Claeys-Leonetti law: EPAL study**

|                           |                                                                                                                                          |                                                                                                                           |
|---------------------------|------------------------------------------------------------------------------------------------------------------------------------------|---------------------------------------------------------------------------------------------------------------------------|
| <b>AP-HM 2017-35 EPAL</b> | <b>Patient number:</b> <input type="text"/> <input type="text"/> <input type="text"/><br>Centre N°.                                      | <input type="text"/> <input type="text"/> <input type="text"/> <input type="text"/> <input type="text"/><br>Inclusion N°. |
| <b>N°2017-A01846-47</b>   | <b>Patient's initials (First name /family name):</b> <input type="text"/> <input type="text"/> <input type="text"/> <input type="text"/> |                                                                                                                           |

## Patient Observation Report

### Personal data

What is your current marital status?

- ☐ Single / Separated / Divorced / Widowed  
☐ Married / In couple / Cohabiting

Do you have any children?

- ☐ No  
☐ Yes, please specify: Number of children:  Number of dependent children:

What is the highest educational grade you achieved?

- ☐ No diploma - Primary school certificate  
☐ BEPC, BEP, CAP, Secondary school diploma below Baccalaureate  
☐ Baccalaureate / Diploma equivalent to Baccalaureate  
☐ Diploma equivalent to Baccalaureate + 2 years  
☐ Diploma superior to Baccalaureate + 2 years

|                                                                                                                                                                                                                                                                                                        |                                                                                                                                                                                                                                                                                                       |                                                                                                                                                                                                                                                                                                                                                                                                                                                                                                                                     |
|--------------------------------------------------------------------------------------------------------------------------------------------------------------------------------------------------------------------------------------------------------------------------------------------------------|-------------------------------------------------------------------------------------------------------------------------------------------------------------------------------------------------------------------------------------------------------------------------------------------------------|-------------------------------------------------------------------------------------------------------------------------------------------------------------------------------------------------------------------------------------------------------------------------------------------------------------------------------------------------------------------------------------------------------------------------------------------------------------------------------------------------------------------------------------|
| <b>AP-HM 2017-35 EPAL</b><br><br>N°2017-A01846-47                                                                                                                                                                                                                                                      | Patient <b>number:</b> <span style="border: 1px solid black; display: inline-block; width: 20px; height: 15px; vertical-align: middle;"></span> <span style="border: 1px solid black; display: inline-block; width: 20px; height: 15px; vertical-align: middle;"></span><br><small>Centre N°.</small> | <span style="border: 1px solid black; display: inline-block; width: 20px; height: 15px; vertical-align: middle;"></span> <span style="border: 1px solid black; display: inline-block; width: 20px; height: 15px; vertical-align: middle;"></span> <span style="border: 1px solid black; display: inline-block; width: 20px; height: 15px; vertical-align: middle;"></span> <span style="border: 1px solid black; display: inline-block; width: 20px; height: 15px; vertical-align: middle;"></span><br><small>Inclusion N°.</small> |
| <b>Patient's initials (First name /family name):</b> <span style="border: 1px solid black; display: inline-block; width: 20px; height: 15px; vertical-align: middle;"></span> <span style="border: 1px solid black; display: inline-block; width: 20px; height: 15px; vertical-align: middle;"></span> |                                                                                                                                                                                                                                                                                                       |                                                                                                                                                                                                                                                                                                                                                                                                                                                                                                                                     |
|                                                                                                                                                                                                                                                                                                        |                                                                                                                                                                                                                                                                                                       |                                                                                                                                                                                                                                                                                                                                                                                                                                                                                                                                     |

- If you have ever worked, what is/was your last occupation? .....

Could you please indicate in which category this occupation falls?

- ☐ Farmers  
☐ Craftsmen, sales staff and business owners  
☐ Executives and freelance professionals  
☐ Intermediate occupations (primary/secondary school teacher, technician, foreman, etc.)  
☐ Employees  
☐ Workers

- Since your hospitalization in this establishment, have you been visited by your family and friends?

- ☐ Not at all  
☐ Less than once a week  
☐ More than once a week  
☐ Every day

- Are you religious (All faiths)      ☐ Yes      ☐ No

If yes, do you practise your religion?      ☐ Yes      ☐ No

### Your information

Unless he/she refuses, **the patient must be properly informed**, according to article L. 1111-2 of the Public Health Code, about his/her state of health, the medical acts and treatments proposed, their possible risks and the foreseeable consequences of a refusal. We would therefore like to know if you feel that, up to now, your right to information has been respected.

- Considering the information you were given about **your illness and the associated diagnosis**, do you feel you were well informed? Please rate this feeling from 0 (no, not at all) to 10 (yes, definitely):
- Considering the information you were given about **your treatments and their possible side-effects**, do you feel you were well informed? Please rate this feeling from 0 (no, not at all) to 10 (yes, definitely):

|                                                                                                                                          |                                                                                                                    |
|------------------------------------------------------------------------------------------------------------------------------------------|--------------------------------------------------------------------------------------------------------------------|
| <b>AP-HM 2017-35 EPAL</b><br><br>N°2017-A01846-47                                                                                        | Patient <b>number:</b> <input type="text"/> <input type="text"/> <input type="text"/><br><small>Centre N°.</small> |
| <input type="text"/> <input type="text"/> <input type="text"/> <input type="text"/> <input type="text"/><br><small>Inclusion N°.</small> |                                                                                                                    |
| <b>Patient's initials (First name /family name):</b> <input type="text"/> - <input type="text"/>                                         |                                                                                                                    |

**Your pain**

During the past week, how would you rate your usual pain on a numerical scale: between 0 and 10 (0 = no pain and 10 = unbearable pain)?

During the past week, how would you rate your maximum pain on a numerical scale: between 0 and 10 (0 = no pain and 10 = unbearable pain)?

**Your suffering**

The Claeys-Leonetti law replaced the term ‘pain’ with the term ‘suffering’ (see articles L. 1110-5, L. 1110-5-3 and R. 4127-37 of the Public Health Code). According to parliamentary debate, the term ‘**suffering**’ should be understood to mean all **physical and moral pain**. This is why we would like to know how you quantify the suffering you experience.

Regarding your current suffering, could you quantify it on a scale from 0 (no suffering) to 10 (maximum suffering imaginable)?

**Your quality of life**

### EORTC QLQ-C15-PAL (version 1)

We are interested in you and your health. Answer all the questions yourself by circling the number that best applies to your situation. There is no ‘right’ or ‘wrong answer. This information is strictly confidential.

|    |                                                                                  | Not at all / Somewhat / Quite a bit / A lot |   |   |   |
|----|----------------------------------------------------------------------------------|---------------------------------------------|---|---|---|
|    |                                                                                  | 1                                           | 2 | 3 | 4 |
| 1. | Do you have difficulty taking a little walk outside?                             |                                             |   |   |   |
| 2. | Do you have to stay in bed or in a chair during the day?                         |                                             |   |   |   |
| 3. | Do you need help with eating, dressing, washing or going to the toilet/bathroom? |                                             |   |   |   |



|                                                                                                                                     |                 |                                                                                     |                                                                                                                               |
|-------------------------------------------------------------------------------------------------------------------------------------|-----------------|-------------------------------------------------------------------------------------|-------------------------------------------------------------------------------------------------------------------------------|
| <b>AP-HM 2017-35 EPAL</b>                                                                                                           | Patient number: | <input type="text"/> <input type="text"/> <input type="text"/> <input type="text"/> | <input type="text"/> <input type="text"/> <input type="text"/> <input type="text"/> <input type="text"/> <input type="text"/> |
| N°2017-A01846-47                                                                                                                    |                 | Centre N°.                                                                          | Inclusion N°.                                                                                                                 |
| Patient's initials (First name /family name): <input type="text"/> <input type="text"/> - <input type="text"/> <input type="text"/> |                 |                                                                                     |                                                                                                                               |

**Respecting the autonomy of patients**

**1. by respecting their verbally expressed wishes regarding the continuation, limitation, refusal or cessation of treatment and medical procedures.**

You will first be asked about the **question of refusing a treatment or requesting its discontinuation**. This is a patient's right set out in article L. 1111-4 of the Public Health Code. The word 'treatment' is to be understood as **anything that helps to cure, relieve symptoms or prevent the onset of a disease**. Treatments therefore include *chemotherapy, radiotherapy and immunotherapy*. Since the Claeys-Leonetti law of February 2, 2016, artificial feeding and hydration are considered treatments.

When a patient decides to refuse or discontinue a treatment, do you think that the physician should, in all circumstances and including when it puts the patient's life in danger, respect the patient's expressed will, after having informed the patient of the consequences and the seriousness of his or her decision, and after having given the patient reasonable time to repeat it?

- ☐ Yes  
☐ No  
☐ Don't know

|                                                                                                                                   |                                                                                                     |                                                                                                                               |
|-----------------------------------------------------------------------------------------------------------------------------------|-----------------------------------------------------------------------------------------------------|-------------------------------------------------------------------------------------------------------------------------------|
| <b>AP-HM 2017-35 EPAL</b>                                                                                                         | Patient number: <input type="text"/> <input type="text"/> <input type="text"/> <input type="text"/> | <input type="text"/> <input type="text"/> <input type="text"/> <input type="text"/> <input type="text"/> <input type="text"/> |
| N°2017-A01846-47                                                                                                                  | Centre N°.                                                                                          | Inclusion N°.                                                                                                                 |
| Patient's initials (First name /family name): <input type="text"/> <input type="text"/> <input type="text"/> <input type="text"/> |                                                                                                     |                                                                                                                               |

### Your opinion on the Claeys-Leonetti law and on euthanasia (2/9)

You will now be questioned on the issue of **unreasonable obstinacy**. The Public Health Code (articles L. 1110-5-1 and R. 4127-37) stipulates that the physician's duty is **not to pursue or to undertake medical acts or treatments with unreasonable obstinacy**. By medical act, we mean a preventive act (a medical consultation) or an investigative act (an X-ray, a scanner, an MRI). As stated above, treatment is anything that helps to cure, relieve symptoms or prevent the onset of a disease. From a legal point of view, **treatment is the opposite of care**. Care should be continued as much as possible because it provides comfort to the patient. This includes, for example, *baths, massages, aesthetic treatments*, in other words, body care and any means of pain relief. On the contrary, treatments must be stopped when their continuation would constitute obstinacy, i.e. when they present more drawbacks than benefits for the patient. The Claeys-Leonetti law stipulates that **artificial nutrition and hydration** (administered by gastric tube or intravenous infusion), which are now considered as treatments, can be stopped when they are continued by unreasonable obstinacy.

- Concerning the principle of refusal of unreasonable obstinacy, do you think that, subject to the expressed will of the patient, it is necessary to impose on the physician not to continue or to undertake a medical act or treatment judged to be useless, disproportionate, or having no effect other than to maintain life artificially?
  - ☐ Yes
  - ☐ No
  - ☐ Don't know
  
- As far as artificial feeding and hydration are concerned, do you think they are treatments like any other?
  - ☐ Yes
  - ☐ No
  - ☐ Don't know

### Your opinion on the Claeys-Leonetti law and on euthanasia (3/9)

When **the patient is no longer able to express his or her wishes orally**, either because he or she is in a coma or because he or she is unable to express a clear and coherent wish, **the physician is legally obliged to seek the wishes that the patient may have previously expressed**: either in advance directives; or from the trusted person he or she has designated;

|                                                                                                                                                                                                                                                                                                                          |                                                                                                                                                                                       |                                                                                                                                                                                                                                                                                                     |
|--------------------------------------------------------------------------------------------------------------------------------------------------------------------------------------------------------------------------------------------------------------------------------------------------------------------------|---------------------------------------------------------------------------------------------------------------------------------------------------------------------------------------|-----------------------------------------------------------------------------------------------------------------------------------------------------------------------------------------------------------------------------------------------------------------------------------------------------|
| <b>AP-HM 2017-35 EPAL</b><br><br>N°2017-A01846-47                                                                                                                                                                                                                                                                        | Patient <b>number:</b> <span style="border: 1px solid black; padding: 0 5px;">  </span> <span style="border: 1px solid black; padding: 0 5px;">  </span><br><small>Centre N°.</small> | <span style="border: 1px solid black; padding: 0 5px;">  </span> <span style="border: 1px solid black; padding: 0 5px;">  </span> <span style="border: 1px solid black; padding: 0 5px;">  </span> <span style="border: 1px solid black; padding: 0 5px;">  </span><br><small>Inclusion N°.</small> |
| <b>Patient's initials (First name /family name):</b> <span style="border: 1px solid black; padding: 0 5px;">  </span> <span style="border: 1px solid black; padding: 0 5px;">  </span> <span style="border: 1px solid black; padding: 0 5px;">  </span> <span style="border: 1px solid black; padding: 0 5px;">  </span> |                                                                                                                                                                                       |                                                                                                                                                                                                                                                                                                     |

and, in the absence of a trusted person, from the family or friends. This is provided for in article L. 1111-12 of the Public Health Code.

**a) Advance directives**

- If you heard someone talk about advance directives, would you know what they are?

☐ Yes

☐ No

Advance directives are a document drawn up by a person who has reached the age of majority, expressing his or her wishes concerning the conditions for continuing, limiting, stopping or refusing medical treatment or procedures. This document is intended to apply when the person concerned is no longer able to express his or her wishes orally.

- Have you drafted any advance directives?

☐ Yes

☐ No

**Before the adoption of the Claeys-Leonetti law, advance directives were valid for three years.**  
**Since the adoption of the Claeys-Leonetti law, advance directives no longer have any stipulated duration of validity.** They are valid until modified or revoked.

- Regarding the validity of advance directives, do you think that there should be a time limit?

☐ Yes

☐ No

☐ Don't know

If yes, for how long (in years):     

**Your opinion on the Claeys-Leonetti law and on euthanasia (4/9)**

**Before the adoption of the Claeys-Leonetti law, advance directives were only advisory.** The physician was obliged to consult them but was not obliged to respect them.

|                                                                                                                                            |                                                                                                            |                                                                                                                               |
|--------------------------------------------------------------------------------------------------------------------------------------------|------------------------------------------------------------------------------------------------------------|-------------------------------------------------------------------------------------------------------------------------------|
| <b>AP-HM 2017-35 EPAL</b>                                                                                                                  | Patient <b>number:</b> <input type="text"/> <input type="text"/> <input type="text"/> <input type="text"/> | <input type="text"/> <input type="text"/> <input type="text"/> <input type="text"/> <input type="text"/> <input type="text"/> |
| <b>N°2017-A01846-47</b>                                                                                                                    | Centre N°.                                                                                                 | Inclusion N°.                                                                                                                 |
| <b>Patient's initials (First name /family name):</b> <input type="text"/> <input type="text"/> - <input type="text"/> <input type="text"/> |                                                                                                            |                                                                                                                               |

**Since the adoption of the Claeys-Leonetti law**, advance directives are **binding**. The physician must not only consult them but must also respect them (except for medical emergencies, non-conformity with the medical situation or their manifest inappropriateness).

These provisions are to be found in Article L. 1111-11 of the Public Health Code.

Regarding the value of advance directives, do you agree that they should be binding?

- ☐ Yes
- ☐ No
- ☐ Don't know

|                                                                                                                                            |                                                                                                            |                                                                                                                               |
|--------------------------------------------------------------------------------------------------------------------------------------------|------------------------------------------------------------------------------------------------------------|-------------------------------------------------------------------------------------------------------------------------------|
| <b>AP-HM 2017-35 EPAL</b>                                                                                                                  | <b>Patient number:</b> <input type="text"/> <input type="text"/> <input type="text"/> <input type="text"/> | <input type="text"/> <input type="text"/> <input type="text"/> <input type="text"/> <input type="text"/> <input type="text"/> |
| N°2017-A01846-47                                                                                                                           | Centre N°.                                                                                                 | Inclusion N°.                                                                                                                 |
| <b>Patient's initials (First name /family name):</b> <input type="text"/> <input type="text"/> - <input type="text"/> <input type="text"/> |                                                                                                            |                                                                                                                               |

|  |
|--|
|  |
|--|

**Your opinion on the Claeys-Leonetti law and on euthanasia (5/9) b) The trusted support person**

- If you hear the term 'a trusted person', do you know what that means?

- ☐ Yes  
☐ No

**The trusted person is a close relative, a parent or a doctor who is designated by an adult. He or she is consulted in the event that the latter is unable to express his or her wishes. If the patient wishes, this trusted person can accompany him or her in his or her steps and attend medical meetings in order to help him or her make decisions. These provisions are to be found in article L. 1111-6 of the Public Health Code. In addition, article L. 1111-12 of the same Code stipulates that the **testimony of the trusted person prevails over any other testimony.****

- Regarding the person designated as the "trusted support person", do you think that he or she is capable of correctly conveying the patient's previously expressed wishes?

- ☐ Yes  
☐ No  
☐ Don't know

- Regarding the value of the testimony of the trusted person, do you agree that it should prevail over any other testimony?

- ☐ Yes  
☐ No  
☐ Don't know

- Still on the subject of the value of the testimony of the trusted person, would you be in favour of the content of the testimony imposing on the physician the course of action to be taken?

- ☐ Yes  
☐ No  
☐ Don't know

**Your opinion on the Claeys-Leonetti law and on euthanasia (6/9) Respecting the dignity of ill people**

**1. By creating a right to deep and continuous sedation**

The French Society of Accompaniment and Palliative Care (SFAP) defines sedation as "the quest, by medicinal means, for a decrease in vigilance that can go as far as loss of

|                                                                                                                                   |                                                                                                     |                                                                                                                               |
|-----------------------------------------------------------------------------------------------------------------------------------|-----------------------------------------------------------------------------------------------------|-------------------------------------------------------------------------------------------------------------------------------|
| <b>AP-HM 2017-35 EPAL</b>                                                                                                         | Patient number: <input type="text"/> <input type="text"/> <input type="text"/> <input type="text"/> | <input type="text"/> <input type="text"/> <input type="text"/> <input type="text"/> <input type="text"/> <input type="text"/> |
| N°2017-A01846-47                                                                                                                  | Centre N°.                                                                                          | Inclusion N°.                                                                                                                 |
| Patient's initials (First name /family name): <input type="text"/> <input type="text"/> <input type="text"/> <input type="text"/> |                                                                                                     |                                                                                                                               |

**consciousness**". Its aim is to reduce or dissipate the perception of a situation experienced as unbearable by the patient, when all available means adapted to this situation have been proposed and/or implemented without providing the expected relief.

Sedation is said to be **deep** when it completely alters consciousness. It is said to be **continuous** when it is maintained until death.

The Claeys-Leonetti law introduced in article L. 1110-5-2 of the Public Health Code the **patient's right to deep and continuous sedation**, when he or she is suffering from a **serious and incurable disease**, and his or her **vital prognosis is life-threatening in the short term**, that is, he or she has only a few hours or a few days to live. The patient must also be experiencing suffering that is resistant to treatment or has decided to discontinue a life-sustaining treatment, thus threatening his or her vital prognosis in the short term, and with the risk of enduring unbearable suffering. If these conditions are met, the patient can ask the doctor to receive this sedation. It will be associated with analgesia (pain treatment) and the cessation of all treatments, including artificial nutrition and hydration. A group of medical professionals is set up including the doctor in charge of the patient, a consulting doctor and the health care team, if it exists, to verify that the conditions laid down by the law are respected.

- When a patient is seriously and incurably ill, and provided that his or her vital prognosis is life-threatening in the short term, do you approve of the possibility of deep and continuous sedation in the event of intractable suffering?

☐ Yes  
☐ No  
☐ Don't know

- When a patient is seriously ill and incurable, and provided that his or her vital prognosis is life-threatening in the short term, do you approve of the possibility of deep and continuous sedation when he or she has, on his or her own initiative, decided to stop a vital treatment, this cessation of treatment being likely to cause unbearable suffering?

☐ Yes  
☐ No  
☐ Don't know

- When the patient is unable to express his or her wishes and, in the context of the refusal of unreasonable obstinacy, if the physician stops life-sustaining treatment, should he or she apply deep and continuous sedation?

☐ Yes  
☐ No  
☐ Don't know

### Your opinion on the Claeys-Leonetti law and on euthanasia (7/9)

|                                                                                                               |                        |                                   |                                                         |
|---------------------------------------------------------------------------------------------------------------|------------------------|-----------------------------------|---------------------------------------------------------|
| <b>AP-HM 2017-35 EPAL</b>                                                                                     | <b>Patient number:</b> | <div><div></div><div></div></div> | <div><div></div><div></div><div></div><div></div></div> |
| <b>N°2017-A01846-47</b>                                                                                       |                        | Centre N°.                        | Inclusion N°.                                           |
| <b>Patient's initials (First name /family name):</b> <div><div></div><div></div>-<div></div><div></div></div> |                        |                                   |                                                         |

When a patient is seriously and incurably ill, and provided that his or her vital prognosis is life-threatening in the short term, do you approve of the possibility of deep and continuous sedation in the case of mental suffering without physical suffering?

- ☐ Yes
- ☐ No
- ☐ Don't know

|                                                                                                                                            |                                                                                                            |                                                                                                |  |
|--------------------------------------------------------------------------------------------------------------------------------------------|------------------------------------------------------------------------------------------------------------|------------------------------------------------------------------------------------------------|--|
| <b>AP-HM 2017-35 EPAL</b>                                                                                                                  | Patient <b>number:</b> <input type="text"/> <input type="text"/> <input type="text"/> <input type="text"/> | Centre N°: <input type="text"/> <input type="text"/> <input type="text"/> <input type="text"/> |  |
| N°2017-A01846-47                                                                                                                           | Inclusion N°: <input type="text"/> <input type="text"/> <input type="text"/> <input type="text"/>          |                                                                                                |  |
| <b>Patient's initials (First name /family name):</b> <input type="text"/> <input type="text"/> - <input type="text"/> <input type="text"/> |                                                                                                            |                                                                                                |  |

**Your opinion on the Claeys-Leonetti law and on euthanasia (8/9) 2. By maintaining the prohibition of facilitated suicide, assisted suicide and euthanasia**

The Sicard report, which was examined in parliament in December 2012, recommended the implementation of **facilitated suicide** rather than **assisted suicide**, by allowing the prescription of lethal products without involving the responsibility of a third party. In facilitated suicide, the patient is free to administer the lethal product or not. **Euthanasia** is the act of a third party who deliberately terminates the life of a person in order to put an end to a situation deemed unbearable. At the end of the parliamentary debate, **neither facilitated suicide, assisted suicide nor euthanasia was legalized.**

**Definitions:**

- *Facilitated suicide: prescription of lethal products*
- *Assisted suicide: active assistance of a third party for the administration of lethal products*
- *Euthanasia: the act of intentionally causing the death of another person in order to end their suffering*

- The Claeys-Leonetti law did not legalize facilitated suicide after all. Do you agree with this point of the law?

- ☐ Yes  
☐ No  
☐ Don't know

- The Claeys-Leonetti law did not legalize assisted suicide after all. Do you agree with this point of the law?

- ☐ Yes  
☐ No  
☐ Don't know

- The Claeys-Leonetti law did not legalize euthanasia after all. Do you agree with this point of the law?

- ☐ Yes  
☐ No  
☐ Don't know

|                                                                                                |                                                                  |                                                                                     |
|------------------------------------------------------------------------------------------------|------------------------------------------------------------------|-------------------------------------------------------------------------------------|
| <b>AP-HM 2017-35 EPAL</b><br><br><b>N°2017-A01846-47</b>                                       | <b>Patient number:</b> <input type="text"/> <input type="text"/> | <input type="text"/> <input type="text"/> <input type="text"/> <input type="text"/> |
|                                                                                                | Centre N°.                                                       | Inclusion N°.                                                                       |
| <b>Patient's initials (First name /family name):</b> <input type="text"/> <input type="text"/> |                                                                  |                                                                                     |

\_\_\_\_\_

**If you answered ‘no’ to any of the above,** would you be in favour of legalizing...?

- ☐ Facilitated suicide (prescription of lethal products)
- ☐ Assisted suicide (active assistance of a third party for the administration of lethal products)
- ☐ Euthanasia
- ☐ All of the above
- ☐ Don't know

### Your opinion on the Claeys-Leonetti law and on euthanasia (9/9)

- If a new law on the end of life allowed for euthanasia, could you be led to resort to it on your own person?
  - ☐ Yes
  - ☐ No
  - ☐ Don't know
- Were there any questions in this interview that bothered you?
  - ☐ Yes
  - ☐ No

If so, which ones (write in Free Comments)?

- Has this questionnaire changed your opinion on anything?
  - ☐ Yes
  - ☐ No

If so, on which subject?

- Free comments:

[illegible]
